# Supplementary material for: The RNA-binding protein QKI5 is a direct target of C/EBPα and delays macrophage differentiation
Source: PubMed Central journal article supplement — Mol Biol Cell. 2012 May 1;23(9):1628–35. doi: 10.1091/mbc.E11-05-0412 (PMC3338430; doi:10.1091/mbc.e11-05-0412), 2012-05-01
Supplement: supp_E11-05-0412_CombinedSupMats.pdf [file supp_E11-05-0412_CombinedSupMats.pdf]

## Supplementary Figure legends

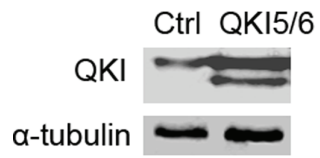

Fig S1

### **Fig S1 QKI5 is the main isoform expressed in HL-60 cells.**

HEK293 cells that were co-transfected with both QKI5 and QKI6 expression vectors were harvested for Western blot analysis. The band of endogenous QKI in HL-60 cells was exactly the same size as the exogenous QKI5.

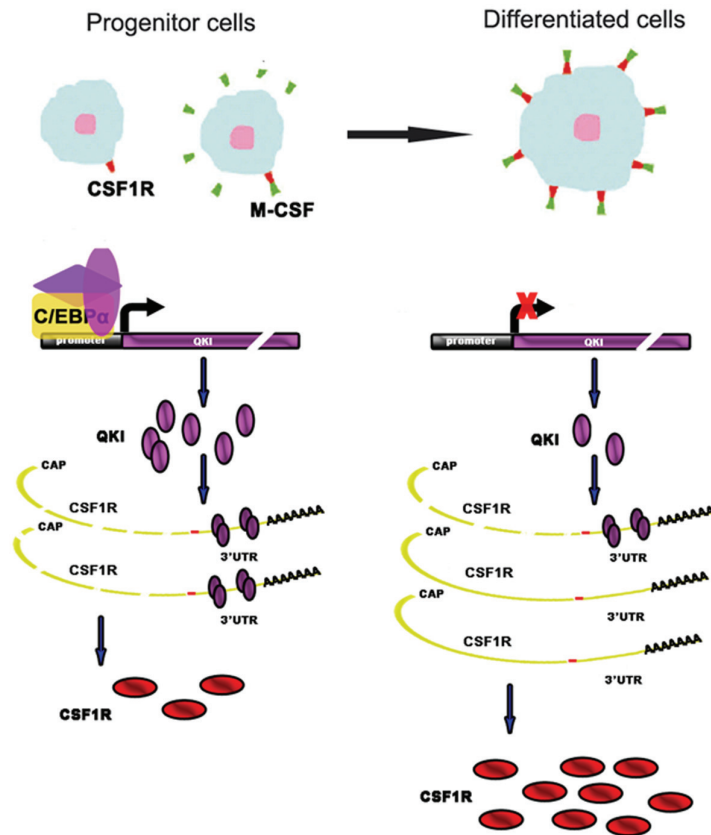

Fig S2

**Fig S2 A schematic illustration of the role of QKI in monocytic-macrophage differentiation.**

In undifferentiated cells or cells at an earlier differentiation stage (left), an abundant expression of QKI was activated by C/EBP $\alpha$ , which leads to a decreased stability of the simultaneously transcribed CSF1R mRNA at this stage, delaying the differentiation process. Upon terminal differentiation, QKI expression levels drop and release the repression of CSF1R (right), resulting in the facilitated expression of CSF1R and subsequent macrophage differentiation.

Table 1. Primers and Sequences Used in the experiment

| Gene/Primer name          | Sequence                           |
|---------------------------|------------------------------------|
| Semi-RT-PCR QKI5          |                                    |
| Forward                   | AGAGCAGTTGAAGTGAAG                 |
| Reverse                   | GAAGGTCATAGGTTAGTTGCC              |
| qPCR QKI5                 |                                    |
| Forward                   | ATCCTATTGAACCTAGTGGTGTA            |
| Reverse                   | GGTCAGAAGGTCATAGGTTAGTT            |
| qPCR QKI6                 |                                    |
| Forward                   | ATCCTATTGAACCTAGTGGTGTA            |
| Reverse                   | AGGGTTCAGTTAAGACCGTTCT             |
| qPCR QKI7                 |                                    |
| Forward                   | ATCCTATTGAACCTAGTGGTGTA            |
| Reverse                   | AACAGCTGCTGTATTCTAGTCCT            |
| p27                       |                                    |
| Forward                   | GGGACTTGGAGAAGCACTGC               |
| Reverse                   | TTCTTGGGCGTCTGCTCCAC               |
| $\beta$ -actin            |                                    |
| Forward                   | GAAAATCTGGCACCACACCT               |
| Reverse                   | GGCCGGACTCGTCATACTC                |
| qPCR GAPDH                |                                    |
| Forward                   | GACCTGACCTGCCGTCTA                 |
| Reverse                   | AGGAGTGGGTGTCGCTGT                 |
| qPCR CSF1R                |                                    |
| Forward                   | CGGTGACCTTGCGATGTG                 |
| Reverse                   | CGTTGTTGGTGCTGAGGAT                |
| CSF1R mRNA 3'UTR          |                                    |
| Forward                   | GGGAATTCACA ACTATCAGTTCTGCTGAGGAG  |
| Reverse                   | GGCTGCAGGCATTAATGCTGTTAGTTTAATGTGG |
| CSF1RmRNA $\Delta$ 3'UTR1 |                                    |
| Forward                   | GGGAATTCACA ACTATCAGTTCTGCTGAGGAG  |
| Reverse                   | GTCTGCAGAATGTGGACAGAGACATCCCAC     |
| CSF1RmRNA $\Delta$ 3'UTR2 |                                    |

|                  |                                                                                                                       |
|------------------|-----------------------------------------------------------------------------------------------------------------------|
| Forward          | GGGAATTCACA <u>ACTATCAGTTCTGCTGAGGAG</u>                                                                              |
| Reverse          | CTCTGCAGAGTTTGTGCTTCCTGCTTGG                                                                                          |
| CSF1RmRNA 3'UTRm |                                                                                                                       |
| Forward          | GGGAATTCACA <u>ACTATCAGTTCTGCTGAGGAG</u>                                                                              |
| Reverse          | GGCTGCAGGCC <i>CAGT</i> ATGCTG <i>AGGAG</i> TTAATG                                                                    |
| Luciferase gene  |                                                                                                                       |
| Forward          | TCGTTGACCGCCTGAAGT                                                                                                    |
| Reverse          | CATCGTCGGGAAGACCTG                                                                                                    |
| QPm1             |                                                                                                                       |
| Forward          | GATCTCCGACTTCTATAGATCAAGGACTTCATTG<br>GTGCAGCTGAGGAAATT <i>AGAGTACATA</i> AGTCTAA<br>ATGTTGGAAATCCACCAA <u>ACTGCA</u> |
| Reverse          | GTTTGGTGGATTTC AACATTTAGACTT <i>ATG</i> ACT<br><i>CTA</i> ATTTCCCTCAGCTGCACCAATGAAGTCCTTGA<br>TCTATAGAAGTCGGA         |
| QPm2             | CCTCACGGAACACTGA <i>ATGTCGATATCA</i> AGCATT<br>CGAGCACG                                                               |
| QKI siRNA        |                                                                                                                       |
| Sense            | GGCACCUCACAGAGAUGCCAACAUA                                                                                             |
| Antisense        | UAAUGUUGGCAUCUCUGUAGGUGCC                                                                                             |
| NC siRNA         |                                                                                                                       |
| Sense            | UUCUCCGAACGUGUCACGUTT                                                                                                 |
| Antisense        | ACGUGACACGUUCGGAGAATT                                                                                                 |

---

NOTE. Primers and sequences used in the experiment. The restricted endonuclease sites are underlined. NC, negative control. Mutated sites, indicated in italic fold in grey background.
